# Supplementary material for: Advanced imaging and hospice use in end-of-life cancer care
Source: Springer Nature journal article supplement (doi:10.1007/s00520-018-4223-0), 2018-05-04
Supplement: MOESM3 [file 15739390]

**Online Resource 3**. Patient Characteristics by Hospital Referral Region Tertile of Imaging (n = 55,058)a

| Variable | Overall, No. (%) | Top Tertile of Imaging Use Withing Hospital Referral Region  by Modality, No. (%) | | | | | |
| --- | --- | --- | --- | --- | --- | --- | --- |
|  |  | CT | | MRI | | PET | |
|  |  | Lower  Tertiles | Top  Tertile | Lower  Tertiles | Top  Tertile | Lower  Tertiles | Top  Tertile |
| Black | 5379 (9.8) | 5.6b | 14.5b | 11.5b | 7.4b | 9.2b | 10.5b |
| Male | 27,889 (50.7) | 50.7 | 50.6 | 51.4b | 49.6b | 52.0b | 49.0b |
| Married | 27,209 (49.4) | 51.0b | 47.7b | 49.7 | 49.0 | 50.8b | 47.7b |
| Multiple comorbid conditions | 14,237 (25.9) | 23.7b | 28.4b | 26.3 | 25.3 | 25.7 | 26.1 |
| Metastatic disease at diagnosis | 24,690 (44.8) | 46.5b | 43.0b | 45.2 | 44.3 | 45.9b | 43.5b |
| Metropolitan residence | 47,180 (85.7) | 78.5b | 93.9b | 83.1b | 89.3b | 80.3b | 92.4b |
| Age ≥ 80 y | 23,361 (42.4) | 42.7 | 42.1 | 40.9b | 44.5b | 41.1b | 44.0b |
| Survival ≤ 6 mo | 20,380 (37.0) | 38.8b | 35.0b | 37.8b | 35.9b | 38.2b | 35.6b |
| US geographic region |  |  |  |  |  |  |  |
| Midwest | 17,516 (31.8) | 24.7b | 39.9b | 48.2b | 9.0b | 51.7b | 7.0b |
| Northeast | 8,400 (15.3) | 2.2b | 30.1b | 11.7b | 20.2b | 4.5b | 28.7b |
| South | 3,484 (6.3) | 3.9b | 9.1b | 8.8b | 2.8b | 0b | 14.2b |
| West | 25,658 (46.6) | 69.2b | 20.8b | 31.3b | 68.0b | 43.8b | 50.1b |
| HRR in top quartile of percentage of residents with less than a high school education | 12,437 (22.6) | 19.3b | 26.4b | 21.4b | 24.2b | 19.4b | 26.6b |
| HRR in top quartile of percentage of residents living in poverty | 12,444 (22.6) | 23.4b | 21.6b | 20.8b | 25.2b | 22.2 | 23.1 |
| HRR in top quartile of percentage of residents of black race | 12,444 (22.6) | 15.7b | 30.5b | 24.0b | 20.6b | 17.7b | 28.7b |

Abbreviations: CT, computed tomography; HRR, hospital referral region; IQR, interquartile range; MRI, magnetic resonance imaging; PET, positron-emission tomography.

a The number of cohort-specific patients and HRRs are as follows: breast cancer (n = 5980 in 21 HRRs), colorectal cancer (n = 11,255 in 32 HRRs), lung cancer (n = 30,295 in 38 HRRs), and prostate cancer (n = 7528 in 27 HRRs).

b *P* < .001 from χ2 test for homogeneity by HRR top vs bottom 2 tertiles of imaging.
